# Supplementary material for: Reduced C9orf72 expression exacerbates polyGR toxicity in patient iPSC-derived motor neurons and a Type I protein arginine methyltransferase inhibitor reduces that toxicity
Source: PubMed Central journal article supplement (PMC10149854; doi:10.3389/fncel.2023.1134090), 2023-04-17
Supplement: Data_Sheet_1.pdf [file Data_Sheet_1.pdf]

## Supplementary Material

# Reduced *C9orf72* Expression Exacerbates polyGR Toxicity in Patient Induced Pluripotent Stem Cell-Derived Motor Neurons and a Type I Protein Arginine Methyltransferase Inhibitor Reduces that Toxicity

Therese L. Dane<sup>1</sup>, Anna L. Gill<sup>1</sup>, Fernando G. Vieira<sup>1\*</sup>, Kyle R. Denton<sup>1</sup>

<sup>1</sup>ALS Therapy Development Institute, Watertown, MA, USA

\* Correspondence: Fernando G. Vieira: fvieira@als.net

### 1 Supplementary Figures

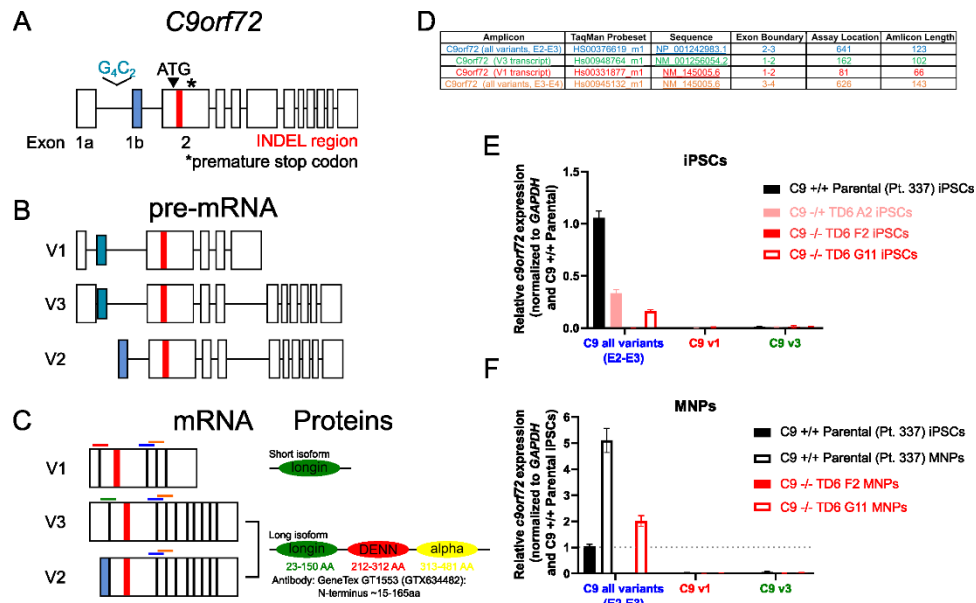

### Supplementary Figure 1: Expression of *C9orf72* Splice Variants

(A-C) Schematic representation of the *C9orf72* gene, pre-mRNA, mRNA, and *C9orf72* protein. CRISPR-Cas9 targeted region of exon 2 highlighted in red introduces a downstream premature stop codon. Antibody used in Fig. 1 binds the N-terminus of *C9orf72*. Modified from Liu et al. 2021 and Xiao et al. 2016. (D) Table of TaqMan probe sets used in E-F. (E) Expression of total *C9orf72*, transcript v1, and transcript v3 in iPSCs normalized to *C9*<sup>+/+</sup> parental (Pt. 337). (F) Expression of *C9orf72* in motor neuron progenitors normalized to *C9*<sup>+/+</sup> parental (Pt. 337) iPSCs.

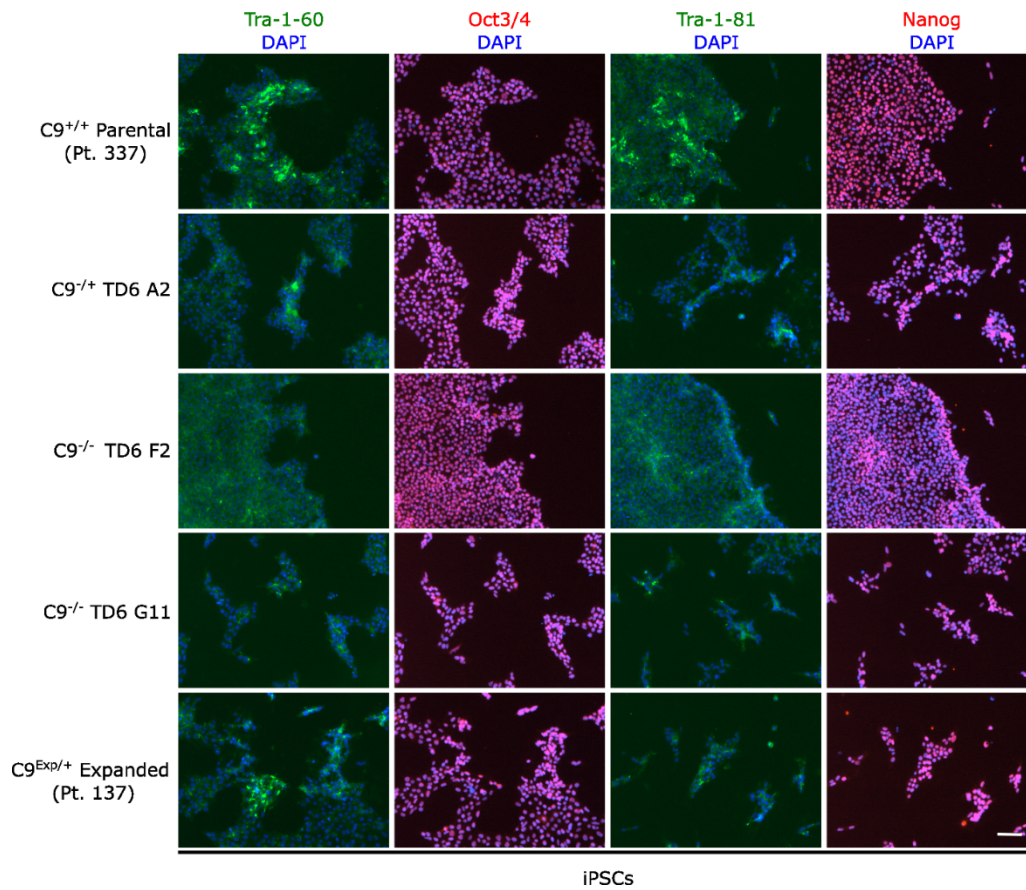

**Supplementary Figure 2: *C9orf72* Knockout iPSCs Maintain Pluripotency Marker Expression**

Representative images of immunocytochemistry for pluripotency markers Tra-1-60, Oct3/4, Tra-1-81, and Nanog.

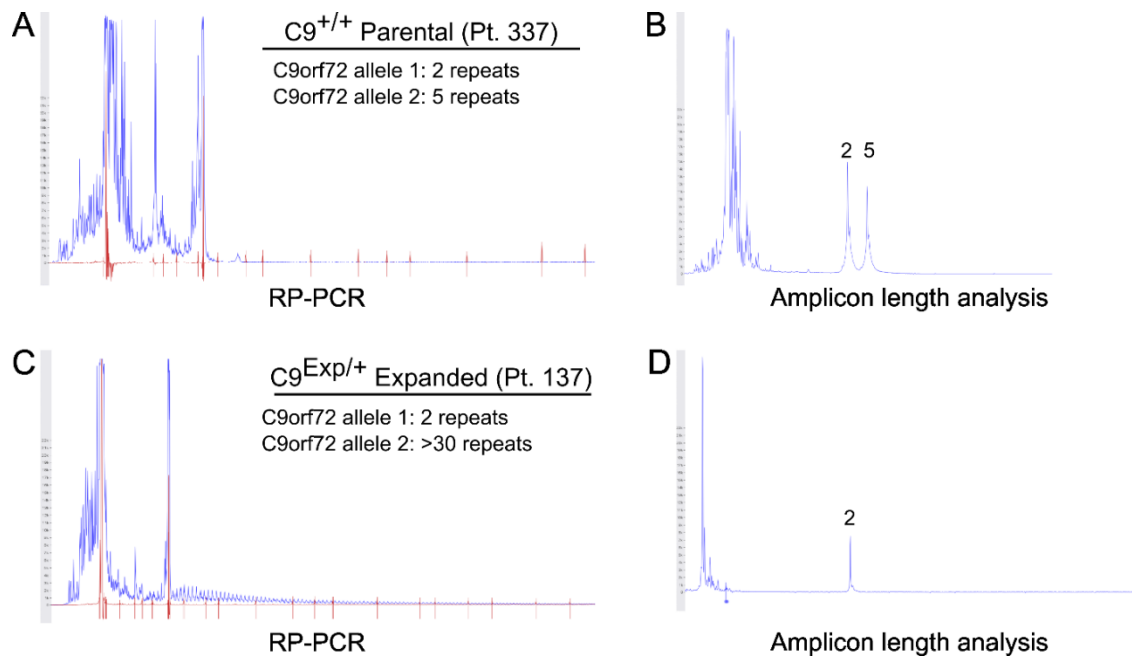

**Supplementary Figure 3: *C9orf72*-HRE Genotyping by Repeat-Primed PCR**

(A) Repeat-primed PCR electropherograms from patient 337 fibroblast genomic DNA. (B) Amplicon length analysis electropherograms from patient 337 fibroblast genomic DNA. (C) Repeat-primed PCR electropherograms from patient 137 fibroblast genomic DNA. Note the sawtooth pattern characteristic of long C9-HRE expansions. (D) Amplicon length analysis electropherograms from patient 137 fibroblast genomic DNA.

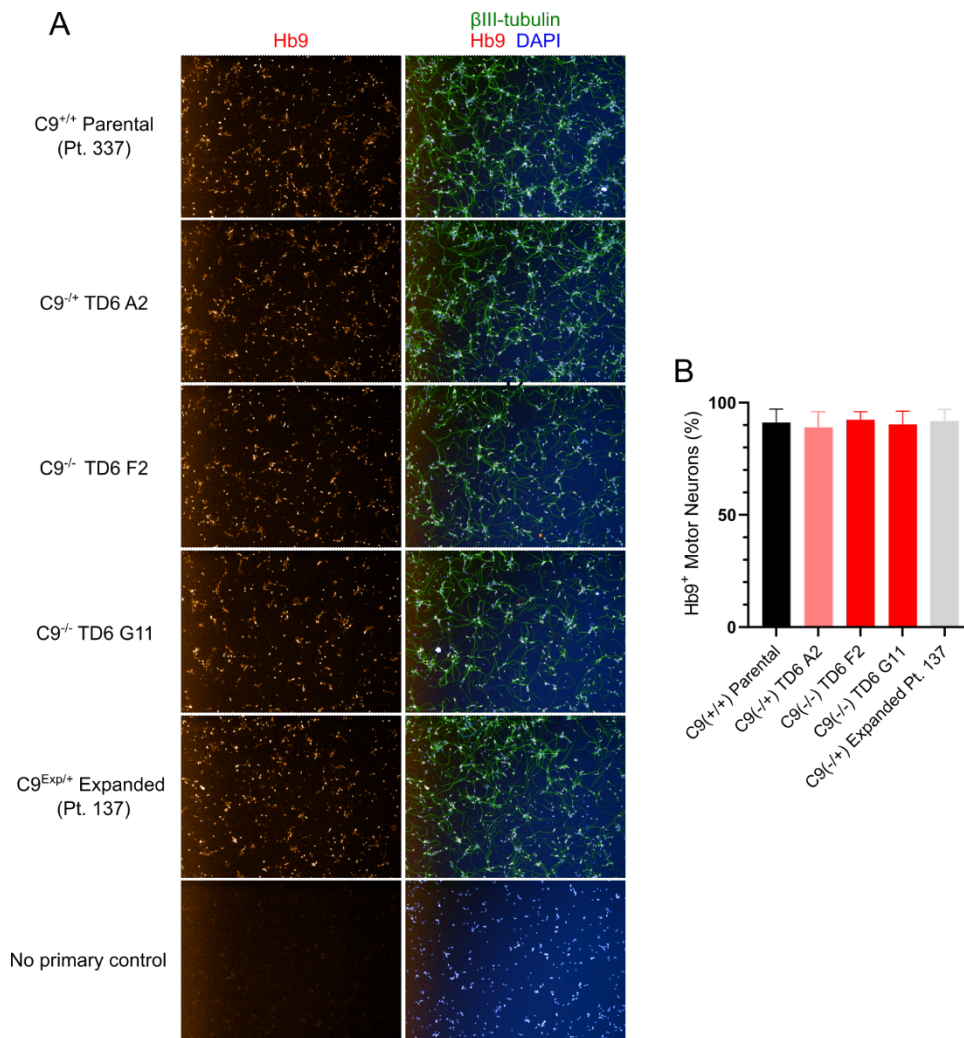

#### Supplementary Figure 4: Spinal Motor Neuron Differentiation Efficiency

**(A)** Representative images of iPSC-MNs stained on day 25 of differentiation for the pan-neuronal marker  $\beta$ III-tubulin (Covance MRB-435P, 1:500) and the spinal motor neuron specific transcription factor Hb9 (*MNX1*, DSHB 815.c10c, 1;100). **(B)** Quantification of the percentage of Hb9<sup>+</sup> cells. No significant difference was observed between cell lines.

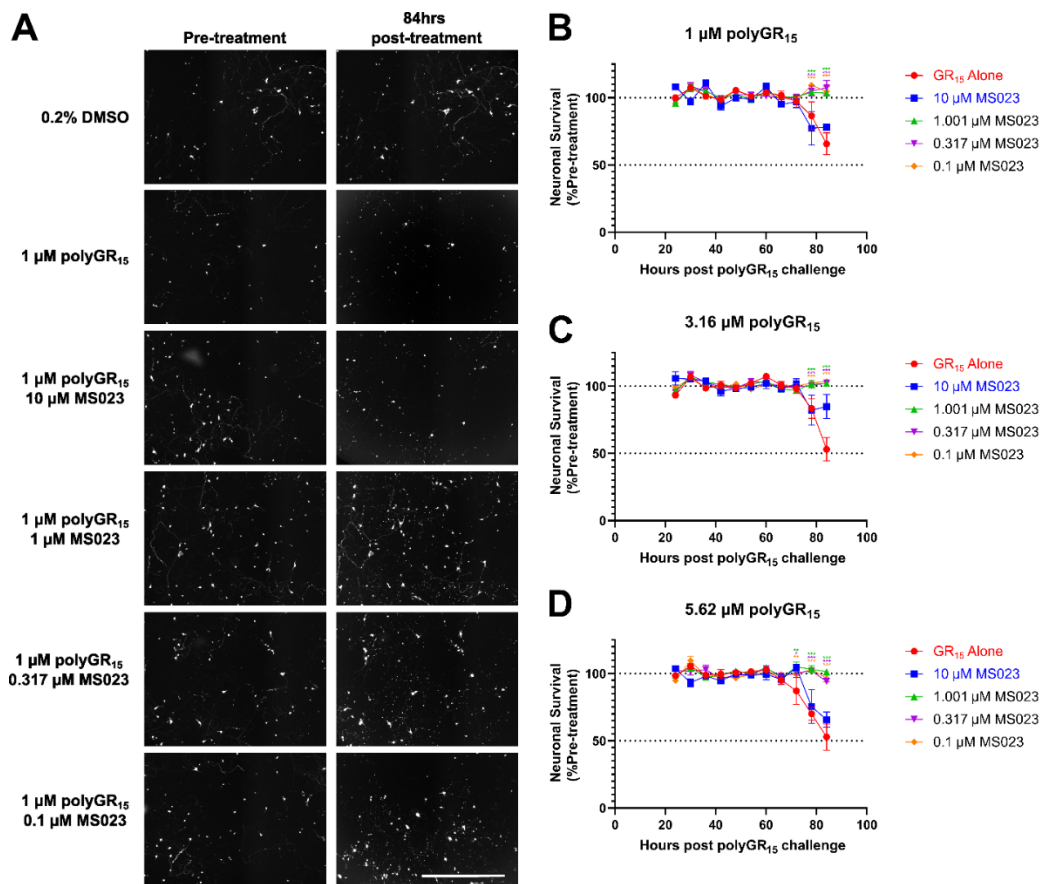

### Supplementary Figure 5: Type I PRMT Inhibition Preserves Neuronal Survival

(A) Representative images of day 12 VACHT-tdTomato neurons before and after polyGR<sub>15</sub> challenge with or without MS023 co-treatment. Scale bar = 2000 μm. (B-D) Quantification of the number of tdTomato<sup>+</sup> MNs measured every 6 hours beginning 24 hours post treatment. For each well, the neuron count was normalized to the same wells previous time point. \* denotes  $p < 0.05$ , \*\* denotes  $p < 0.01$ , \*\*\* denotes  $p < 0.001$  (comparing MS023 co-treated groups to polyGR<sub>15</sub> alone by two-way ANOVA analysis of variance followed by Dunnett's test). Data are presented as mean values  $\pm$  standard deviations (error bars).

**A**

Full blots from Fig. 1F: C9orf72  
iPSC Protein Lysates

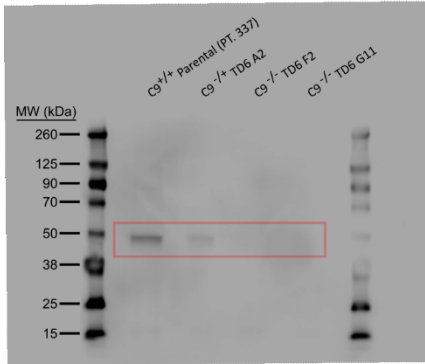

Full blots from Fig. 1F: GAPDH  
iPSC Protein Lysates

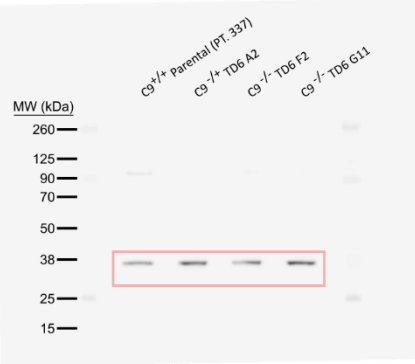

Full blots from Fig. 1F: GAPDH (overexposed to show ladder)  
iPSC Protein Lysates

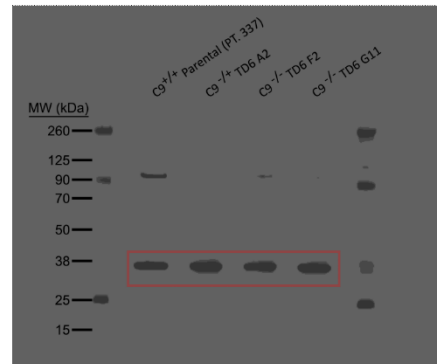

**B**

Full blots from Fig. 1H: C9orf72  
Motor Neuron Progenitor Protein Lysates

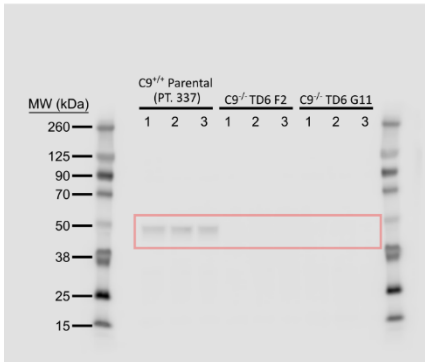

Full blots from Fig. 1H: GAPDH  
Motor Neuron Progenitor Protein Lysates

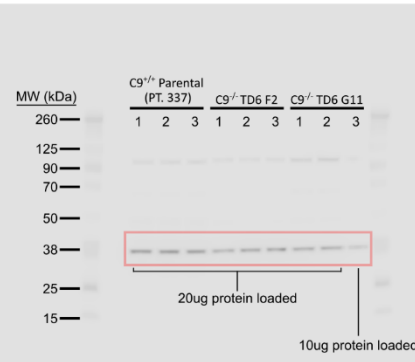

Full blots from Fig. 1H: GAPDH (overexposed to show ladder)  
Motor Neuron Progenitor Protein Lysates

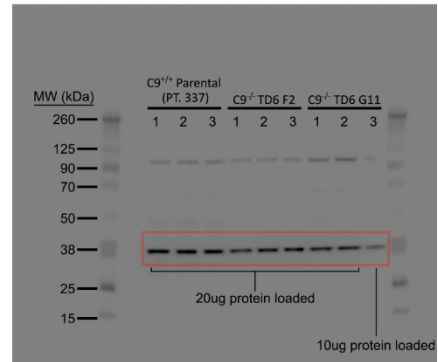

**Supplementary Figure 6: Full Uncropped Western Blot Images from Figure 1**

(A) Full blots for C9orf72 and GAPDH from iPSC lysates shown in Fig. 1F. (B) Full blots for C9orf72 and GAPDH from Motor Neuron Progenitor Protein Lysates shown in Fig. 1H. Only 10ug of total protein was loaded for lane 3 of C9<sup>-/-</sup> TD6 G11 due to insufficient sample volume.
